# Supplementary material for: Insights into reaction mechanisms of ethanol electrooxidation at the Pt/Au(111) interfaces using density functional theory
Source: Royal Society of Chemistry journal article supplement (doi:10.1039/d2cp03186h), 2022-01-01
Supplement: d2cp03186h1.pdf [file d2cp03186h1.pdf]

## Supporting information

Insights into reaction mechanisms of ethanol electrooxidation at the Pt/Au(111) interfaces by density functional theory

Tian Sheng,<sup>a\*</sup> Han-Yue Wu,<sup>a</sup> Xiao Lin,<sup>b</sup> Wen-Feng Lin<sup>c\*</sup>

<sup>a</sup> College of Chemistry and Materials Science, Anhui Normal University, Wuhu, 241000, China.

<sup>b</sup> Department of Chemical Engineering and Biotechnology, University of Cambridge, Cambridge, CB3 0AS, United Kingdom.

<sup>c</sup> Department of Chemical Engineering, Loughborough University, Loughborough, Leicestershire, LE11 3TU, United Kingdom.

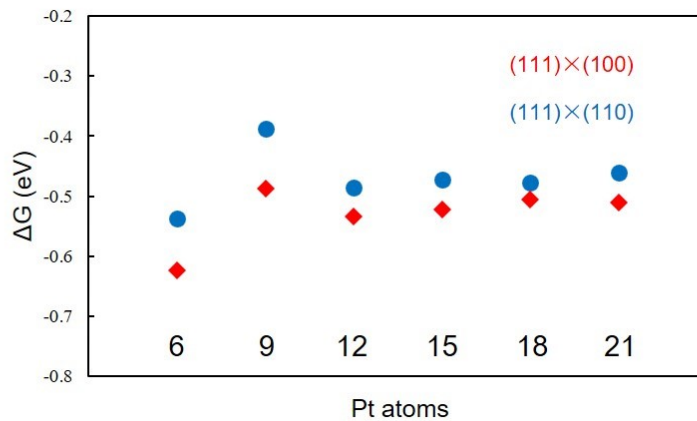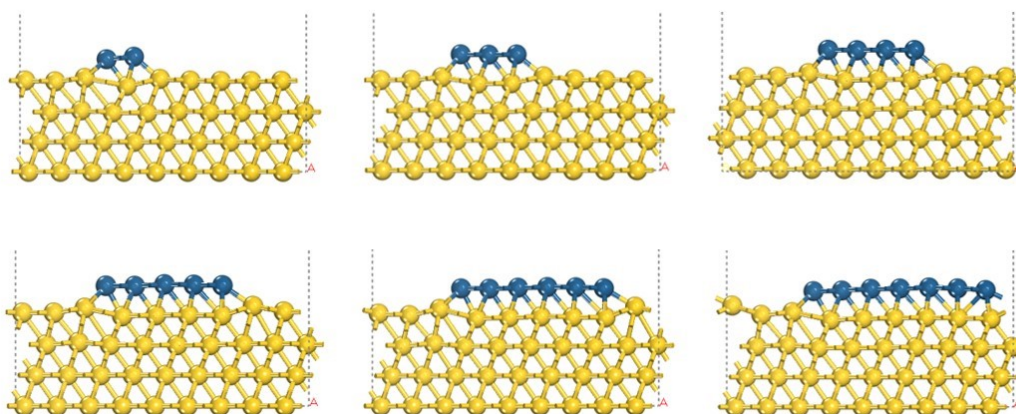

**Fig. S1** Calculated H\* adsorption energies (units in eV) at the stepped interface with different Pt coverage on Au(111).

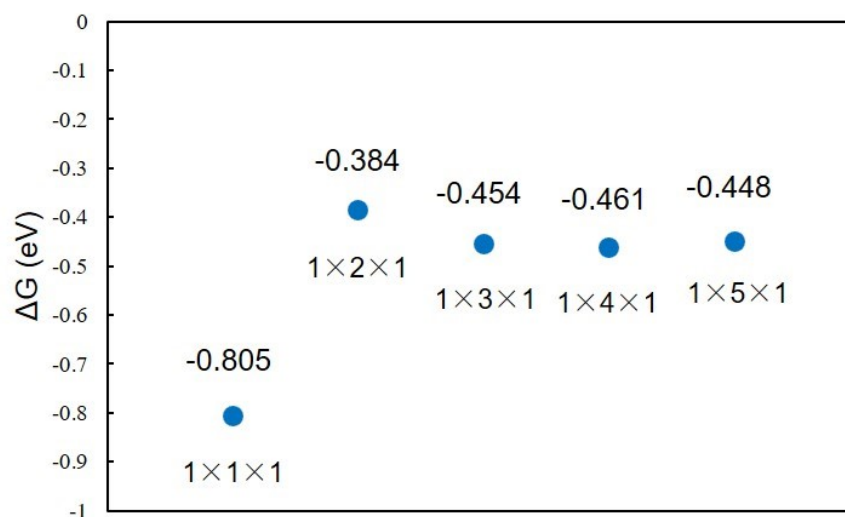

**Fig. S2** Calculated Gibbs free energy of the reaction,  $\text{CH}_3\text{CH}_2\text{OH} \rightarrow \text{CH}_3\text{CHOH}^* + \text{H}^*$ , with different Monkhorst-Pack  $k$ -point sampling at the (111)×(110) interface.

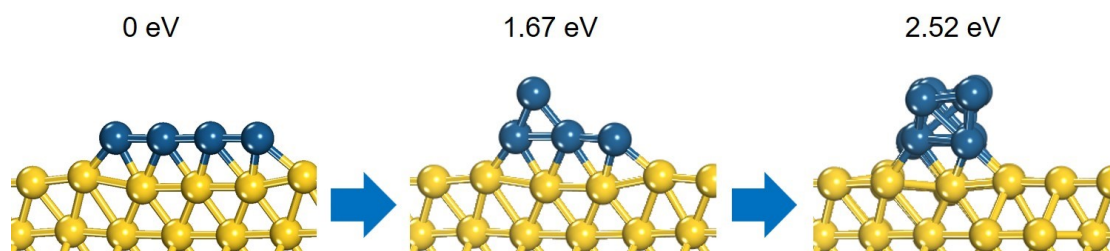

**Fig. S3** The stability of the Pt/Au(111) interface model in thermodynamics.

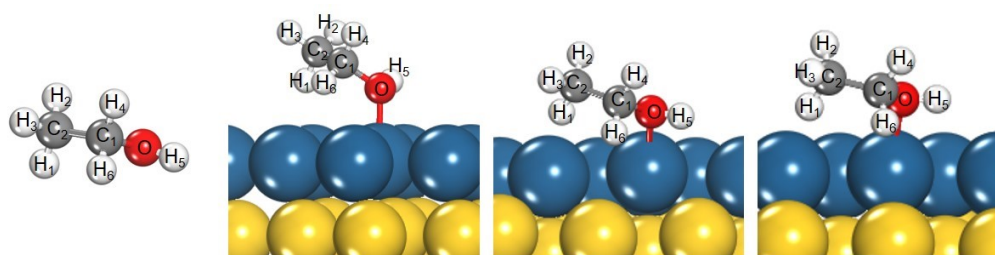

| atom           | vacuum | (111) terrace | (111)×(110) interface | (111)×(100) interface |
|----------------|--------|---------------|-----------------------|-----------------------|
| C <sub>1</sub> | +0.38  | +0.27         | +0.33                 | +0.32                 |
| C <sub>2</sub> | -0.12  | -0.11         | -0.12                 | -0.08                 |
| H <sub>1</sub> | +0.04  | +0.08         | +0.05                 | +0.02                 |
| H <sub>2</sub> | +0.06  | +0.03         | +0.06                 | +0.09                 |
| H <sub>3</sub> | +0.05  | +0.07         | +0.07                 | +0.04                 |
| H <sub>4</sub> | +0.05  | +0.09         | +0.09                 | +0.10                 |
| H <sub>5</sub> | +0.63  | +0.64         | +0.61                 | +0.66                 |
| H <sub>6</sub> | +0.06  | +0.11         | +0.08                 | +0.07                 |
| O              | -1.15  | -1.07         | -1.04                 | -1.10                 |
| total          | 0      | +0.12         | +0.12                 | +0.12                 |

**Fig. S4** Bader charge analysis of each atom (units in e) in the ethanol molecule in vacuum and over the flat (111) terrace and stepped (111)×(110) and (111)×(100) interfaces on Pt/Au(111).

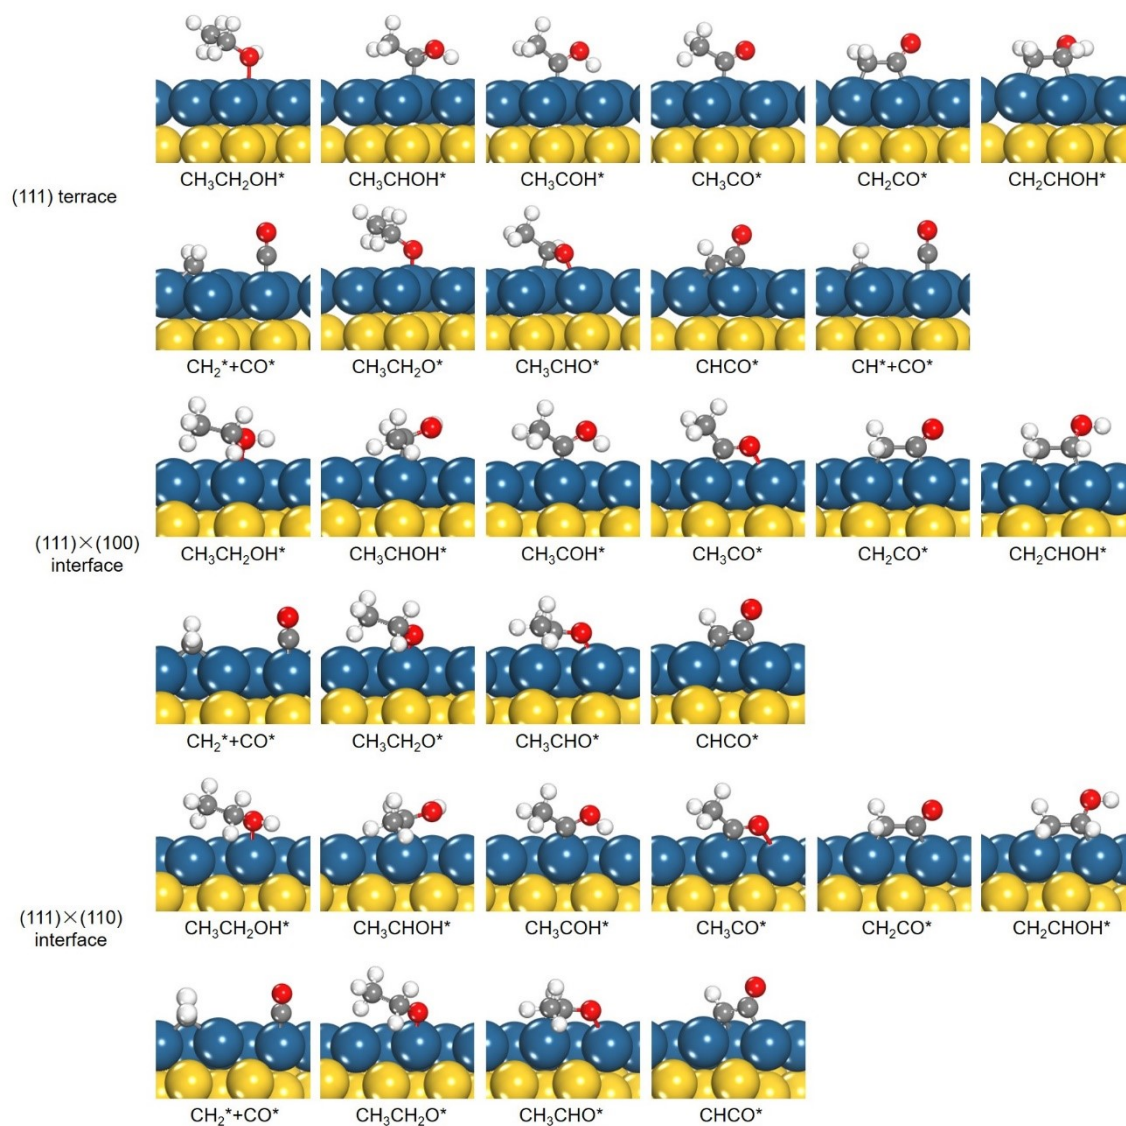

**Fig. S5** Side views of optimized structures of intermediates over the flat (111) terrace and stepped (111)×(100) and (111)×(110) interfaces on Pt/Au(111).

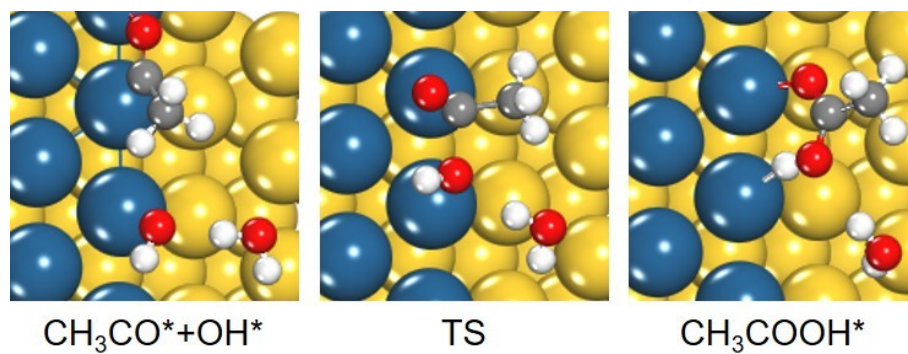

**Fig. S6** Optimized structures of  $\text{CH}_3\text{CO}^* + \text{OH}^*$ , the transition states and  $\text{CH}_3\text{COOH}^*$  on the (111)×(100) interface with one water molecule near the  $\text{OH}^*$ .

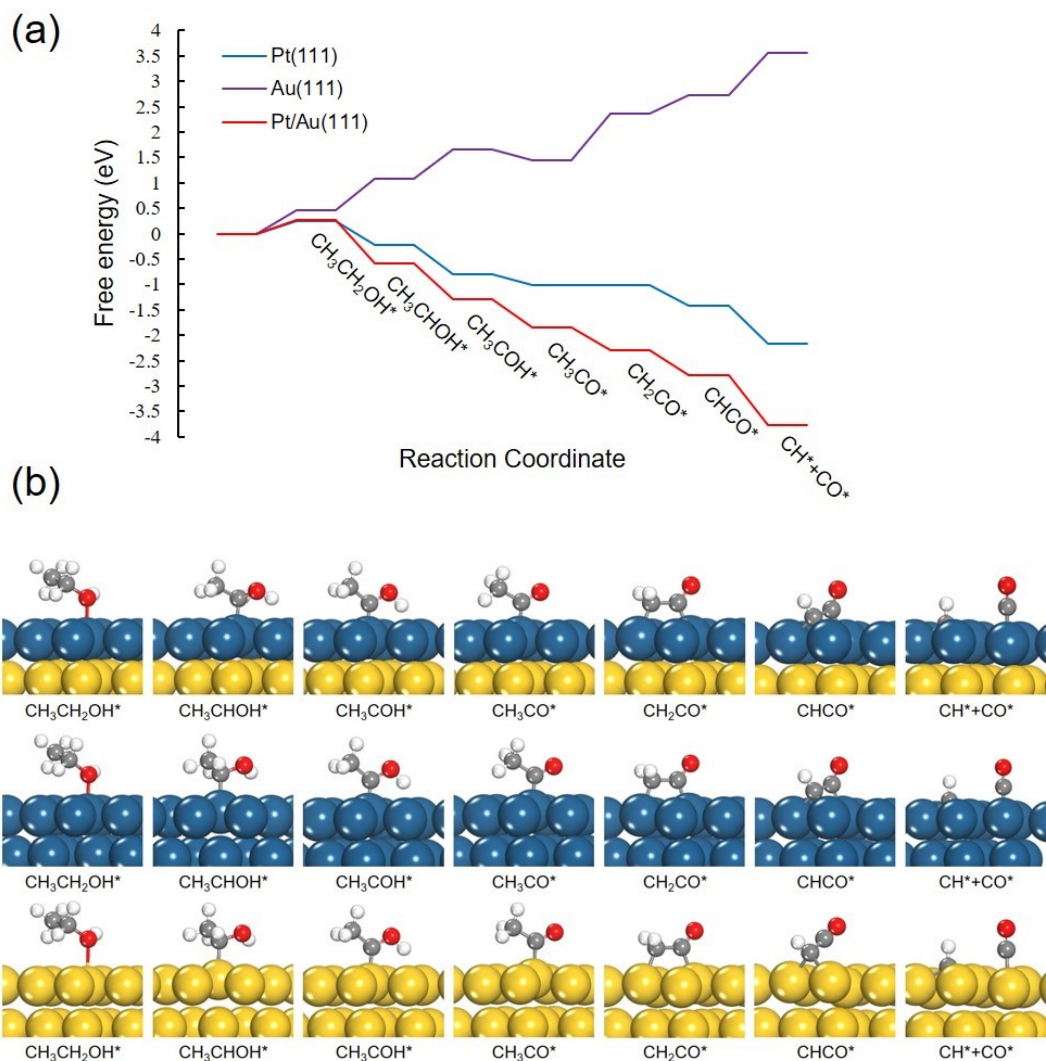

**Fig. S7** (a) Comparison of Gibbs free energy profiles for ethanol decomposition on Pt(111), Au(111) and Pt/Au(111). (b) Optimized structures of intermediates on Pt(111), Au(111) and Pt/Au(111).
